# Supplementary material for: Effects of Genotype and Modified Atmosphere Packaging on the Quality of Fresh-Cut Melons
Source: MDPI journal article supplement (doi:10.3390/foods13020256), 2024-01-13
Supplement: s1 [file s1]

Table 1. Effect of genotype, packaging conditions and storage duration on the soluble solids content (SSC, %) in fresh-cut melons

| MA type | Perforation    | <u>Cantalupensis melon</u> |              |              | <u>Inodorus melon</u> |              |              |
|---------|----------------|----------------------------|--------------|--------------|-----------------------|--------------|--------------|
|         |                | Initial                    | 7 days       | 14 days      | Initial               | 7 days       | 15 days      |
| Passive | Non-perforated | 10.00 ± 0.77               | 9.65 ± 1.27  | 9.80 ± 0.30  | 10.56 ± 0.88          | 10.98 ± 0.89 | 10.37 ± 2.09 |
|         | 2 macro-holes  |                            | 9.70 ± 0.98  | 9.67 ± 0.58  |                       | 10.80 ± 0.50 | 10.85 ± 2.65 |
|         | 1 micro-hole   |                            | 9.30 ± 0.98  | 10.05 ± 0.49 |                       | 10.77 ± 0.83 | 10.05 ± 0.69 |
|         | 2 micro-holes  |                            | 8.90 ± 0.50  | 9.80 ± 0.60  |                       | 10.73 ± 0.72 | 10.70 ± 2.35 |
| Active  | Non-perforated | 10.00 ± 0.77               | 9.00 ± 1.76  | 9.30 ± 0.30  | 10.56 ± 0.88          | 11.00 ± 0.59 | 11.40 ± 2.55 |
|         | 1 pinhole      |                            | 9.05 ± 0.69  | 9.97 ± 0.53  |                       | 10.60 ± 0.46 | 9.25 ± 0.88  |
|         | 1 micro-hole   |                            | 10.00 ± 0.80 | 9.35 ± 0.69  |                       | 10.77 ± 0.47 | 9.45 ± 0.88  |
|         | 2 micro-holes  |                            | 9.30 ± 0.98  | 9.40 ± 0.60  |                       | 10.77 ± 0.64 | 10.67 ± 2.00 |

Table 2. Effect of genotype, packaging conditions and storage duration on the firmness (N) of fresh-cut melons

| MA type | Perforation    | <u>Cantalupensis melon</u> |             |             | <u>Inodorus melon</u> |             |             |
|---------|----------------|----------------------------|-------------|-------------|-----------------------|-------------|-------------|
|         |                | Initial                    | 7 days      | 14 days     | Initial               | 7 days      | 15 days     |
| Passive | Non-perforated | 7.53 ± 0.70                | 6.33 ± 0.67 | 6.58 ± 1.38 | 8.89 ± 0.55           | 8.60 ± 0.80 | 8.61 ± 0.77 |
|         | 2 macro-holes  |                            | 6.55 ± 0.59 | 5.54 ± 1.64 |                       | 9.37 ± 1.99 | 7.97 ± 1.53 |
|         | 1 micro-hole   |                            | 6.73 ± 1.14 | 7.47 ± 0.82 |                       | 8.49 ± 0.72 | 7.83 ± 1.36 |
|         | 2 micro-holes  |                            | 6.47 ± 0.57 | 6.00 ± 0.60 |                       | 9.20 ± 0.82 | 7.38 ± 0.79 |
| Active  | Non-perforated | 7.53 ± 0.70                | 6.47 ± 0.64 | 6.69 ± 1.49 | 8.89 ± 0.55           | 8.97 ± 1.28 | 9.08 ± 0.84 |
|         | 1 pinhole      |                            | 6.40 ± 1.11 | 6.47 ± 1.60 |                       | 7.93 ± 0.96 | 7.85 ± 1.37 |
|         | 1 micro-hole   |                            | 6.40 ± 1.08 | 8.03 ± 1.05 |                       | 8.48 ± 1.12 | 8.42 ± 0.97 |
|         | 2 micro-holes  |                            | 6.75 ± 0.57 | 6.07 ± 0.35 |                       | 8.61 ± 0.96 | 7.71 ± 0.94 |
